# Supplementary material for: Fragmentation, auto-modification and post ionisation proton bound dimer ion formation: the differential mobility spectrometry of low molecular weight alcohols
Source: Royal Society of Chemistry journal article supplement (doi:10.1039/c6an00435k), 2016-01-01
Supplement: c6an00435k1.pdf [file c6an00435k1.pdf]

# FRAGMENTATION, AUTO-MODIFICATION AND POST IONISATION PROTON BOUND DIMER ION FORMATION: THE DIFFERENTIAL MOBILITY SPECTROMETRY OF LOW MOLECULAR WEIGHT ALCOHOLS

D.M. Ruskiewicz, C.L.P. Thomas, G.A. Eiceman  
Department of Chemistry  
Loughborough University  
UK  
Wednesday, 18 May 2016

## SUPPLEMENTAL TABLES AND FIGURES

### TABLES

**Table S1** Properties of the alcohols used in the studies, with their molecular mass ( $M$ ), proton affinity ( $PA$ ), boiling point ( $Bp$ ), density ( $\rho$ ) and CAS number. <sup>a</sup> ChemSpider and <sup>b</sup> NIST

| Compound    | $M^b /$<br>g.mol <sup>-1</sup> | $PA^b /$<br>kJ.mol <sup>-1</sup> | $Bp^b /$<br>°C | $\rho^a /$<br>g.cm <sup>-3</sup> | CAS     |
|-------------|--------------------------------|----------------------------------|----------------|----------------------------------|---------|
| Methanol    | 32.0                           | 754.3                            | 64.7           | 0.79                             | 67-56-1 |
| Ethanol     | 46.1                           | 776.0                            | 72.6           | 0.79                             | 64-17-5 |
| Propan-1-ol | 60.1                           | 786.5                            | 95.8           | 0.80                             | 71-23-8 |
| Butan-1-ol  | 74.1                           | 789.2                            | 117.0          | 0.81                             | 71-36-3 |

**Table S2** Instrumental parameters used in capturing dispersion plots, during studies on effect of Teff on alcohol DMS responses.

| Symbol.    | Parameter                                                   | Value                                      |
|------------|-------------------------------------------------------------|--------------------------------------------|
| $F_1$      | DMS transport gas flow                                      | 300-320 cm <sup>3</sup> .min <sup>-1</sup> |
| $F_2$      | Test-atmosphere flow into the DMS transport gas             | 1-5 cm <sup>3</sup> .min <sup>-1</sup>     |
| split      | F2 split                                                    | 1:10                                       |
| $T_{HS}$   | headspace vial temp.                                        | 40 °C                                      |
| $T_{DMS}$  | DMS temp / °C                                               | 45-130 °C                                  |
| $T_H$      | Transfer line temp                                          | 100 °C                                     |
| $H_d$      | d-IMS humidity / pmv                                        | 25-35 ppm(v/v)                             |
| $RF$       | radio-frequency voltage (Dispersion field strength control) | 500-1500 V                                 |
| $E_c$      | Compensation field scan range                               | -860 to 300 V.cm <sup>-1</sup>             |
| $N_s$      | Number of steps in compensation field scan                  | 100                                        |
| $\delta_t$ | Step duration                                               | 10 ms                                      |

**Table S3** Details of permeation sources used in experiments on effect of  $T_{eff}$  on n-alcohols DMS responses, with membrane thickness ( $d_{mem}$ ), calibration time ( $t_{cal}$ ), initial and final masses of permeation sources ( $m_{in}$  and  $m_{fin}$ ), and mean calculated rate of diffusion ( $Q$ ).

| Compound | $d_{mem} / \text{mm}$ | $t_{cal} / \text{min}$ | $m_{in} / \text{g}$ | $m_{fin} / \text{g}$ | $Q / \text{ng.min}^{-1}$ |
|----------|-----------------------|------------------------|---------------------|----------------------|--------------------------|
| MeOH     | 0.5                   | 53,155                 | 2.67243             | 2.66958              | 65.2                     |
| EtOH     | 0.5                   | 90,250                 | 2.84192             | 2.83294              | 99.50                    |
| PrOH     | 0.1                   | 90,265                 | 2.83331             | 2.82049              | 142.03                   |
| BuOH     | 0.1                   | 56,202                 | 2.48272             | 2.47757              | 63.96                    |

**Table S4** Theoretical calculations of ROH ions formation in DMS at  $T_{eff}$  between 391 and 523 K (effective temperatures of ions presented in Figures 1 and 2) where  $[i]$  is the concentration of the ROH at which specific ionclusters and their ratios are formed.

| ROH         | $T_{eff}$<br>/ K | $[i] / \text{mg m}^{-3}$<br>PBT<br>≥95% | $[i] / \text{mg m}^{-3}$<br>PBT/PBD<br>1:1 | $[i] / \text{mg m}^{-3}$<br>PBD<br>≥95% | $[i] / \text{mg m}^{-3}$<br>PBD/PM<br>1:1 | $[i] / \text{mg m}^{-3}$<br>PM<br>≥95% |
|-------------|------------------|-----------------------------------------|--------------------------------------------|-----------------------------------------|-------------------------------------------|----------------------------------------|
| Methanol    | 523              | Out of range                            | 2605                                       | 121                                     | 0.11                                      | 0.009                                  |
|             | 458              | Out of range                            | 130                                        | 6.6                                     | 0.001                                     | Out of range                           |
| Ethanol     | 481              | Out of range                            | 569                                        | 39.7                                    | 0.0005                                    | Out of range                           |
|             | 391              | 110                                     | 3.5                                        | 0.17                                    | Out of range                              | Out of range                           |
| Propan-1-ol | 505              | Out of range                            | 2143                                       | 111                                     | 0.06                                      | 0.003                                  |
|             | 441              | Out of range                            | 53.8                                       | 2.74                                    | Out of range                              | Out of range                           |

## FIGURES

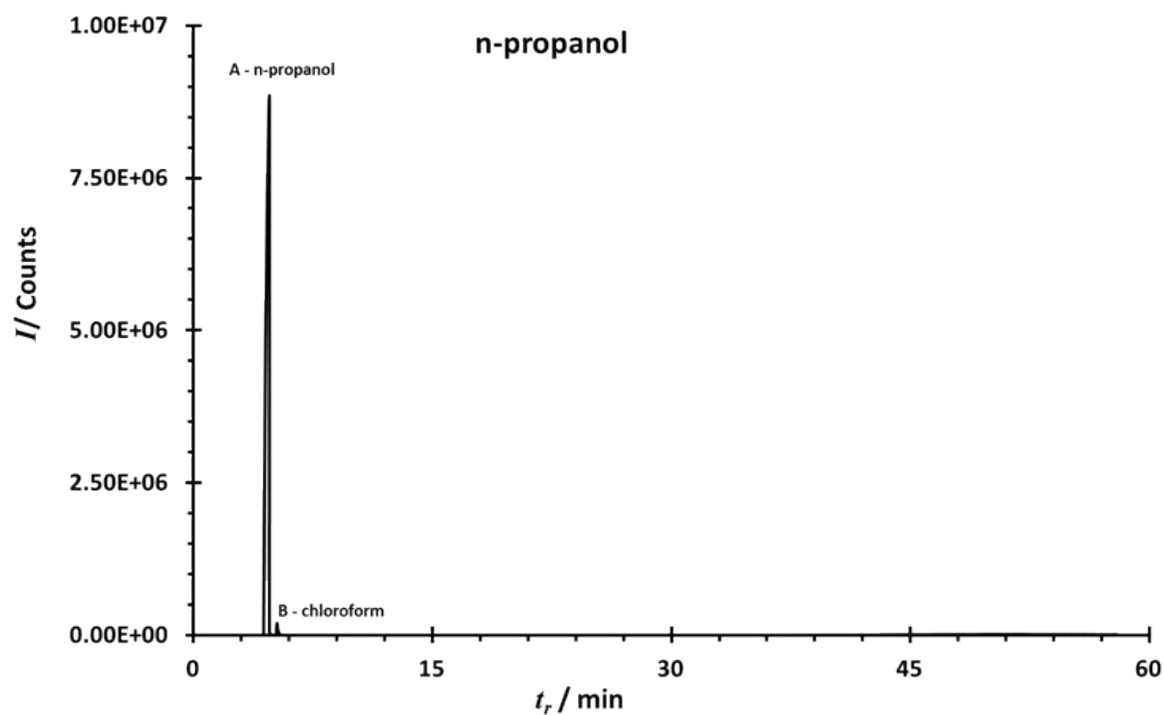

Figure S 1. An example total ion chromatogram of a 0.5 mg.g<sup>-1</sup> propan-1-ol in methanol. Both solvents had been purged with high purity nitrogen before use. The chloroform residue from the syringe clean may be discerned at an estimated concentration of 0.1µg.g<sup>-1</sup> in methanol.

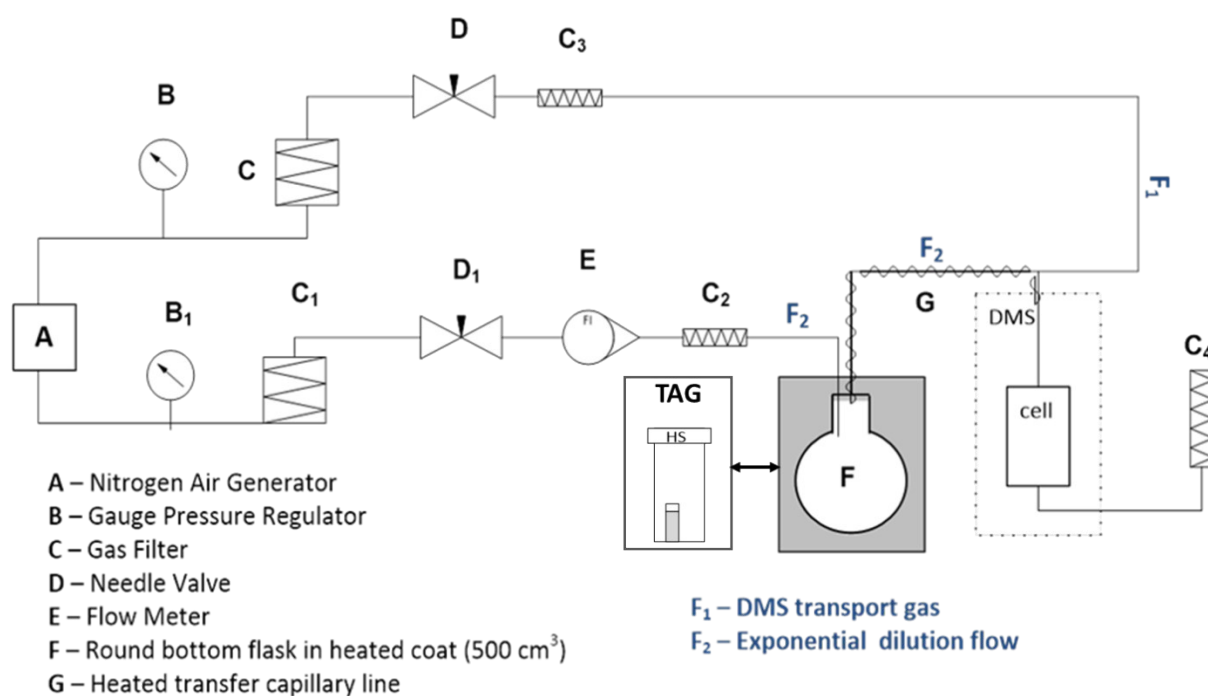

**Figure S1.** Schematic of the System used in effect of concentration and  $T_{\text{eff}}$  on DMS spectra of alcohols from  $C_1$  to  $C_5$ . Nitrogen carrier gas was distributed from nitrogen generator (A) and regulated using pressure regulators with gauge ( $B_1$  and  $B_2$ ). The gas passed through moisture (C and  $C_1$ ) and purification ( $C_2$  and  $C_3$ ) filters and flow was controlled with stainless steel needle valves ( $D_1$  and  $D_2$ ) (Swagelok, UK). Nitrogen flow was split into two streams.  $F_1$  provided around 300 ml min<sup>-1</sup> DMS transport gas flow and  $F_2$  was connected to 500 cm<sup>3</sup> exponential dilution flask or TAG, transferring the vapors of the analyte into the transport gas. At the experiment another carbon trap was installed ( $C_4$ ).

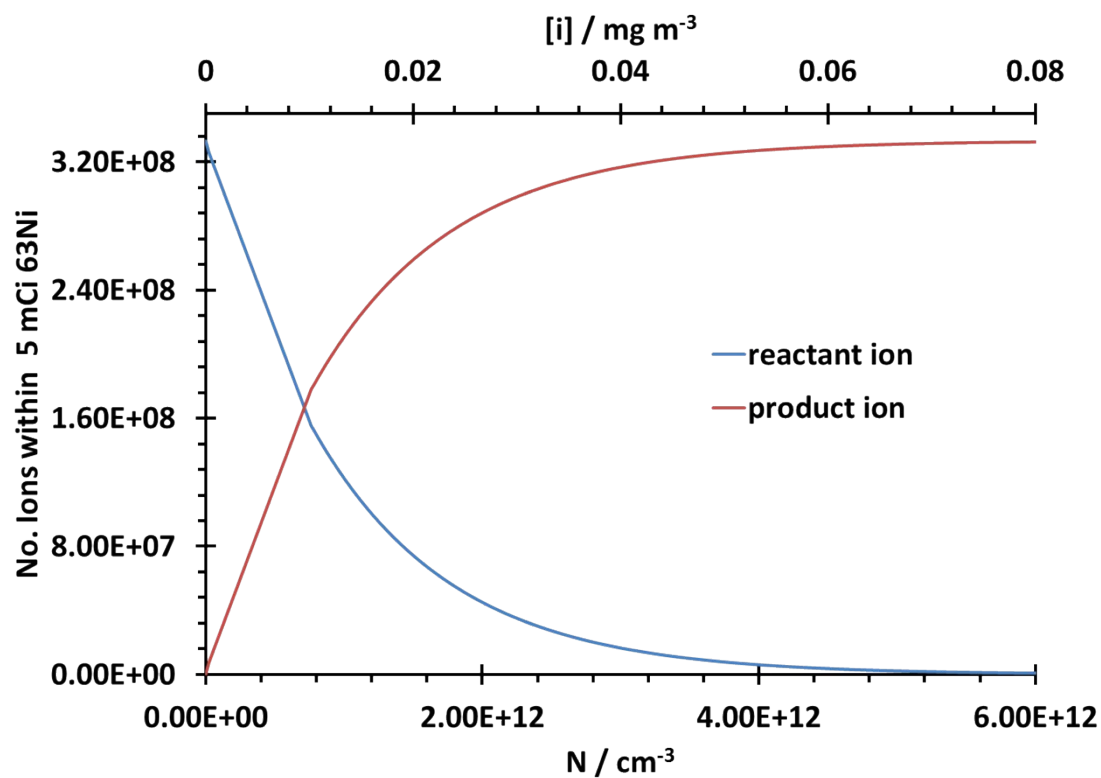

Figure S2. Formation of product ion and depletion of reactant ion as a function of number density  $[N]$ . Plots demonstrate relationship between DMS product ion formation ( $i_p$ ), calculated for methanol ions, in relation to concentration  $[N]$ , showing that 50% of RIP ions is expected to disappear at around  $0.01 \text{ mg m}^{-3}$  level of analyte concentration and to be completely lost at around  $0.03 \text{ mg m}^{-3}$ , where only PI should be observed.

## Expected behaviour

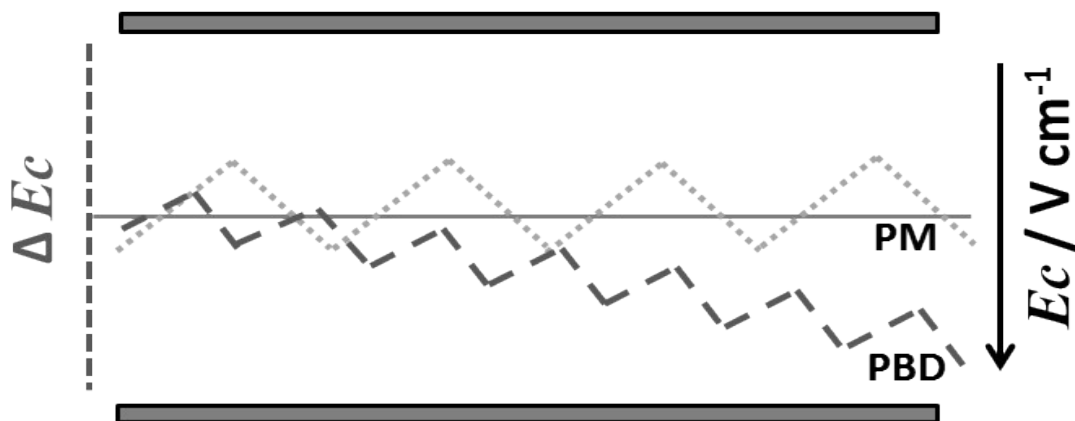

## Observed behaviour

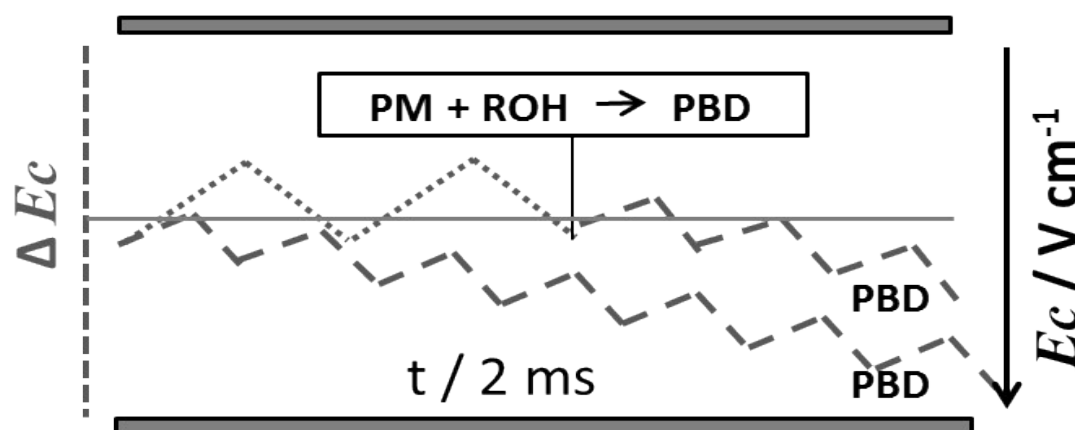

Figure S3. Schematic of the mechanism explaining the convergence of proton bound dimer (PBD) and protonated monomer (PM) signals observed with the increasing concentration of methanol ethanol).  $\Delta E_C$  is a change of the position on the  $E_C$  scale,  $t$  is a travel time of an ion through the DMS cell. Dotted lines trajectory of protonated monomer. Dashed lines trajectory of proton bound dimer.

Top: non compensated ion trajectories for ions formed outside the ion filter in the reaction region.

Bottom: A collision between a protonated monomer and a neutral alcohol molecule within the ion filter generates a proton bound dimer and creates a new trajectory that will result in a shift in the  $E_C$  observed for the ion that falls between the values observed for the protonated monomers and proton bound dimers produced in the reaction region at the entrance to the ion filter.
